# Supplementary material for: Facile fabrication of stable and high-rate Si/NiSix/CNTs Li-ion anodes with a buffering interface
Source: Royal Society of Chemistry journal article supplement (doi:10.1039/c6ra13620f), 2016-01-01
Supplement: c6ra13620f1.pdf [file c6ra13620f1.pdf]

**Facile fabrication of stable and high-rate Si/NiSix/CNTs Li-ion  
anodes with buffering interface**

*Xu Fan,<sup>a,b</sup> Jingjing Ji<sup>a</sup>, Xiangping Jiang<sup>b</sup>, Wei Wang<sup>a,\*</sup>, Zhaoping Liu<sup>a,\*</sup>*

Author address:

a Ningbo Institute of Materials Technology and Engineering,  
Chinese Academy of Sciences Ningbo, Zhejiang 315201, P. R. China

b Department of Material Science and Engineering, Jiangxi Key  
Laboratory of Advanced Ceramic Materials, Jingdezhen Ceramic Institute,  
Jingdezhen, 333001, Jiangxi, China

**Author E-mail address:**

fanxu@nimte.ac.cn

jjjingjing@nimte.ac.cn

jiangxp64@163.com

wangwei@nimte.ac.cn

liuzp@nimte.ac.cn

**Corresponding Author Footnote:** Tel: +86-57486685096, Fax:  
+86-574 86685096, E-mail: wangwei@nimte.ac.cn, liuzp@nimte.ac.cn

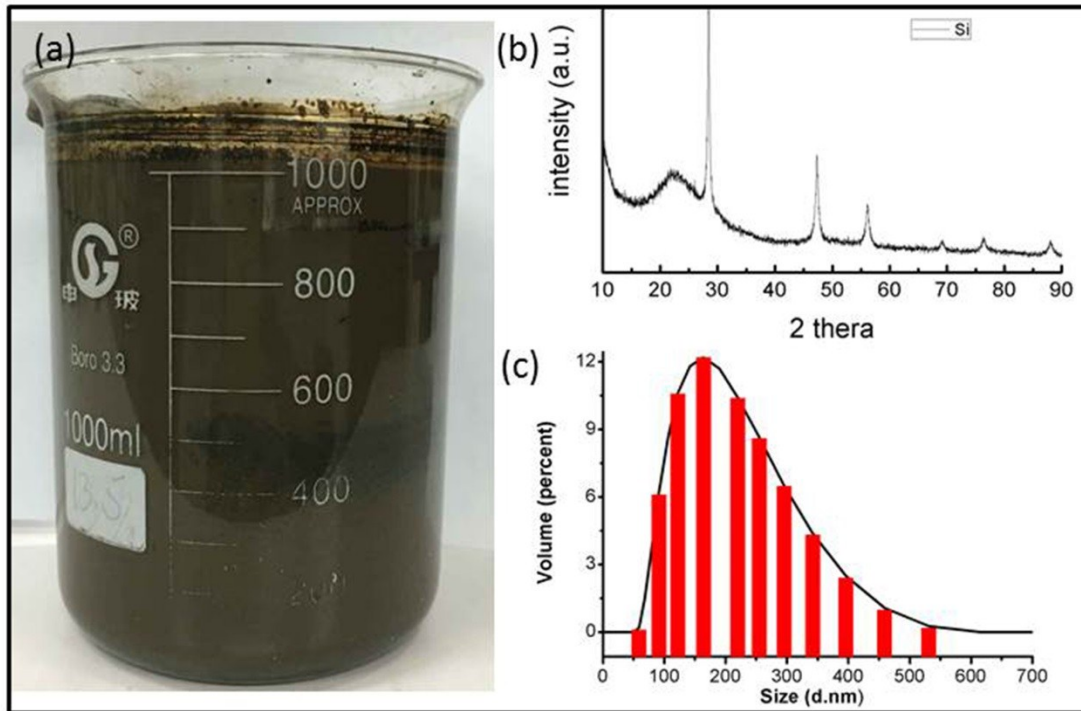

Fig. S1† (a) Optical photo of Si nanoparticle slurry. (b) XRD pattern and (c) size distribution of Si nanoparticles.

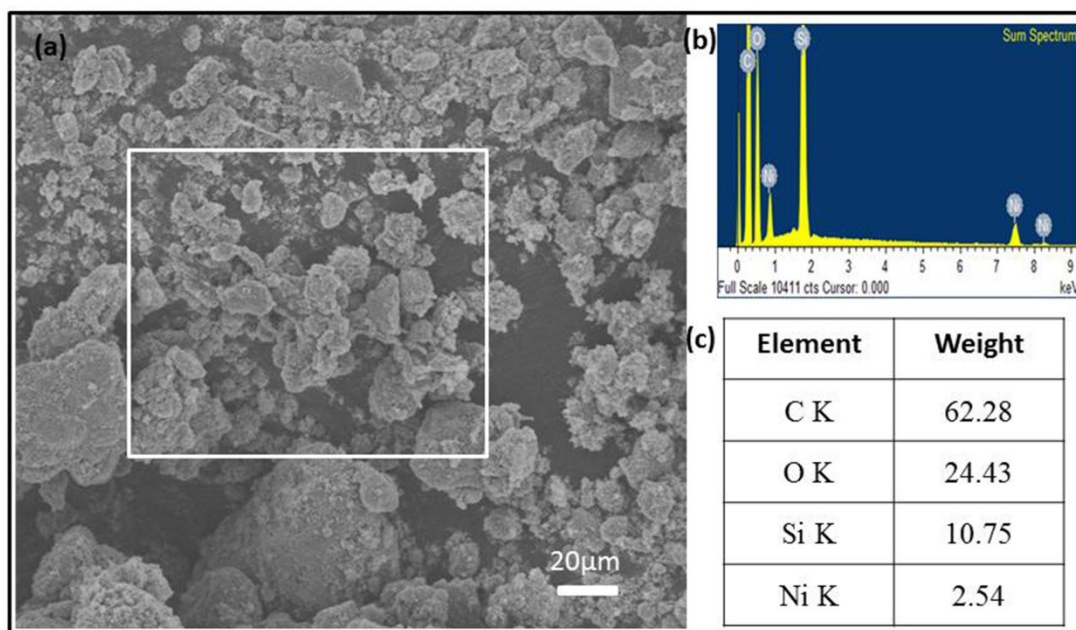

Fig S2† (a) SEM image of Si/NiSi<sub>x</sub>/CNTs composite, (b) Energy-dispersive X-ray spectroscopy (EDX) and (c) weight ratio of different elements corresponded in white box in (a).

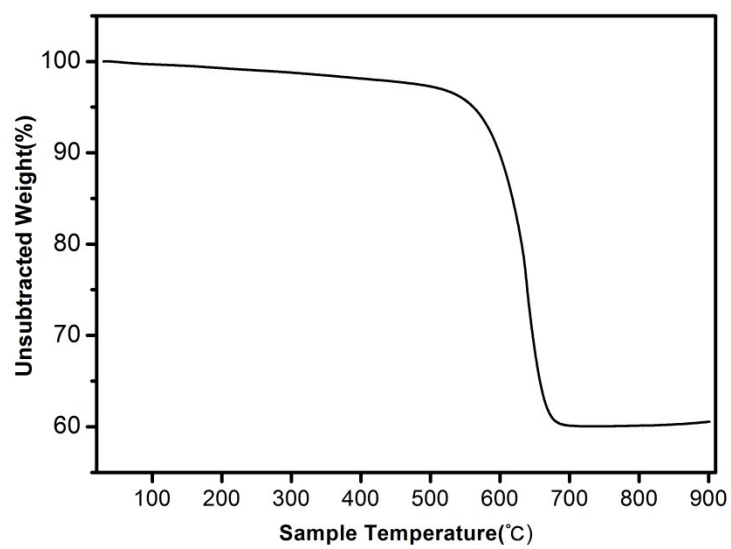

Fig S3. TGA curves of Si/NiSix/CNTs composite

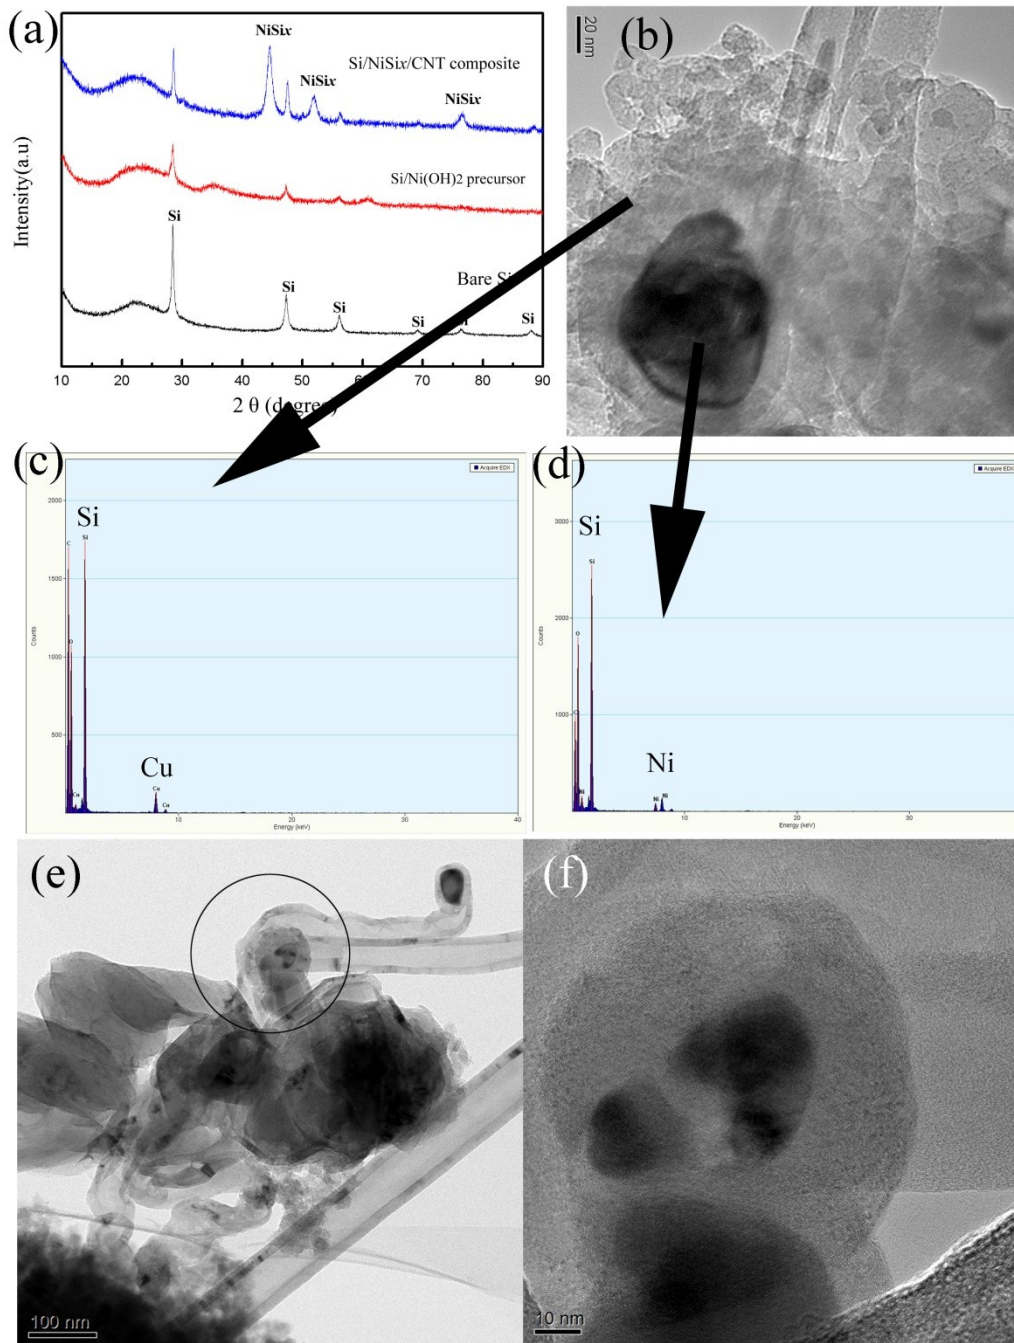

Fig. S4. (a) XRD pattern evolution of precursor, Si matrix and composite; (b) HRTEM image of Si/NiSi<sub>x</sub>/CNTs composite at root, and the corresponding EDS results in (c) area 1 and (d) area 2, and obvious contrast at root in HRTEM images (e) in low magnification and (f) high magnification.

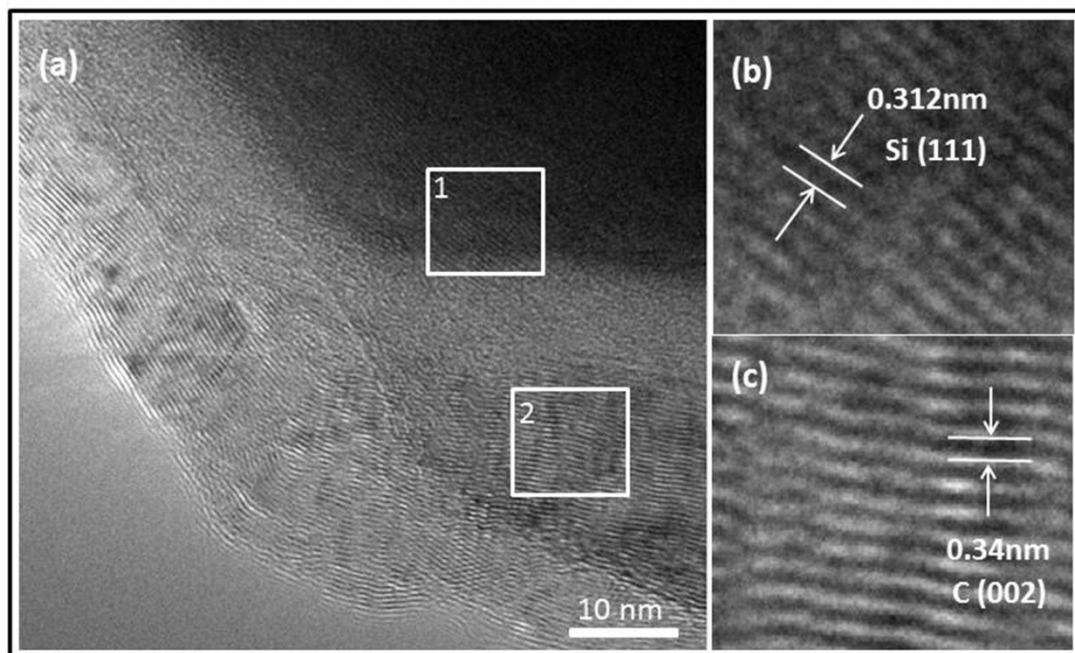

Fig. S5† (a) HR-TEM image of Si/NiSi<sub>x</sub>/CNTs composite. (b, c) HR-TEM images corresponded in white box 1 and box 2 in (a).
